# Supplementary material
Source: HighWire-hosted journal article supplement (https://bmjopenquality.bmj.com/content/10/3/e001570)
Supplement: inline-supplementary-material-1 [file inline-supplementary-material-1.pdf]

# **Nurse Questionnaire for Pre-operative Test Orders**

**\*\*The grid only applies to adult patients undergoing elective hip and knee arthroplasty at Saskatoon City Hospital (SCH).\*\***  
 Tests are valid for 90 days provided there has been no interim change in the patient's condition.  
 If any of the following is yes, order the related tests:

|                                                                                                     | Check all Applicable     | CBC | G&S | Cr | Lytes | Spot Glucose | LFT's | APPT /INR | ECG |
|-----------------------------------------------------------------------------------------------------|--------------------------|-----|-----|----|-------|--------------|-------|-----------|-----|
| <b>Hip or knee arthroplasty</b>                                                                     | <input type="checkbox"/> | ✓   | ✓   |    |       |              |       |           |     |
| <b>History of:</b>                                                                                  |                          |     |     |    |       |              |       |           |     |
| Kidney disease or failure                                                                           | <input type="checkbox"/> |     |     | ✓  | ✓     |              |       |           |     |
| Adrenal disease                                                                                     | <input type="checkbox"/> |     |     | ✓  | ✓     |              |       |           |     |
| Pituitary disease                                                                                   | <input type="checkbox"/> |     |     | ✓  | ✓     |              |       |           |     |
| Major systemic endocrine disease                                                                    | <input type="checkbox"/> |     |     | ✓  | ✓     |              |       |           |     |
| Electrolyte abnormality                                                                             | <input type="checkbox"/> |     |     | ✓  | ✓     |              |       |           |     |
| Diabetes                                                                                            | <input type="checkbox"/> |     |     | ✓  | ✓     | ✓            |       |           |     |
| Bleeding disorder                                                                                   | <input type="checkbox"/> |     |     |    |       |              | ✓     | ✓         |     |
| Liver disease                                                                                       | <input type="checkbox"/> |     |     |    |       |              | ✓     | ✓         |     |
| Malnutrition                                                                                        | <input type="checkbox"/> |     |     |    |       |              | ✓     | ✓         |     |
| Alcohol use greater than two (2) drinks/day for women and greater than three (3) drinks/day for men | <input type="checkbox"/> |     |     |    |       |              | ✓     | ✓         |     |
| Use of anticoagulants (except ASA)                                                                  | <input type="checkbox"/> |     |     |    |       |              |       | ✓         |     |
| Age greater than 69 years                                                                           | <input type="checkbox"/> |     |     |    |       |              |       |           | ✓   |
| Coronary artery disease                                                                             | <input type="checkbox"/> |     |     |    |       |              |       |           | ✓   |
| Peripheral vascular disease                                                                         | <input type="checkbox"/> |     |     |    |       |              |       |           | ✓   |
| Pulmonary vascular disease                                                                          | <input type="checkbox"/> |     |     |    |       |              |       |           | ✓   |
| Two (2) or more risk factors: HTN, CKD, DM, OSA, BMI greater than 35                                | <input type="checkbox"/> |     |     |    |       |              |       |           | ✓   |
| <b>Medications:</b>                                                                                 |                          |     |     |    |       |              |       |           |     |
| Systemic steroid use in the last six (6) months                                                     | <input type="checkbox"/> |     |     |    | ✓     | ✓            |       |           |     |
| Lithium, Diuretic, ACE/ARB                                                                          | <input type="checkbox"/> |     |     | ✓  | ✓     |              |       |           |     |
| Digoxin/antiarrhythmic                                                                              | <input type="checkbox"/> |     |     | ✓  | ✓     |              |       |           | ✓   |
| Chemotherapy (active malignancy)                                                                    | <input type="checkbox"/> |     |     | ✓  | ✓     |              |       |           |     |

Date: \_\_\_\_\_

Nurse Signature: \_\_\_\_\_ Practitioner Signature: \_\_\_\_\_

Form #104245TRIAL 08/2017 Category: Assessments/Histories
